# Supplementary material for: Intelligent Image Classification for Grading Egyptian Cotton Lint
Source: Preprints.org preprint supplement (doi:10.20944/preprints202108.0139.v1), 2021-08-05
Supplement: Supplementary file 1 [file supplementary]

Supplementary Information

Intelligent Image Classification for Grading Egyptian Cotton Lint

Oliver J. Fisher1, Ahmed Rady1, Aly A. A. El-Banna2, Nicholas J. Watson11*, Haitham H. Emaish3

1 Food, Water, Waste Research Group, Faculty of Engineering, University of Nottingham, Nottingham, UK; [olivert.fisher@nottingham.ac.uk](mailto:olivert.fisher@nottingham.ac.uk); [ahmed.rady@nottingham.ac.uk](mailto:ahmed.rady@nottingham.ac.uk)

2 Department of Plant Production, Faculty of Agriculture, Saba Basha, Alexandria University, Egypt; [aly-elsawy@alexu.edu.eg](mailto:aly-elsawy@alexu.edu.eg)

3 Department of Soils and Agricultural Chemistry, Faculty of Agriculture, Saba Basha, Alexandria University, Egypt;[drhaitham1976@alexu.edu.eg](mailto:drhaitham1976@alexu.edu.eg)

* [nicholas.watson@nottingham.ac.uk](mailto:nicholas.watson@nottingham.ac.uk)

Table of Contents

**Figure S1** Distribution of the cultivar Giza 87 extracted features (a) L*, (b) a*, (c) b* and (d) impurity data across the Egyptian cotton lint grades **2**

**Figure S2** Distribution of the cultivar Giza 90 extracted features (a) L*, (b) a*, (c) b* and (d) impurity data across the Egyptian cotton lint grades **2**

**Figure S3** Distribution of the cultivar Giza 94 extracted features (a) L*, (b) a*, (c) b* and (d) impurity data across the Egyptian cotton lint grades **3**

**Figure S4** Distribution of the cultivar Giza 96 extracted features (a) L*, (b) a*, (c) b* and (d) impurity data across the Egyptian cotton lint grades **3**

**Figure S5** The feature impurity plotted against L* (a.b), a* (c,d) and b* (e,f) features and labelled using the actual cotton lint labels (a, c and e) and the K-means clusters (b, d and f) for cultivar Giza 874

**Figure S6** The feature impurity plotted against L* (a.b), a* (c,d) and b* (e,f) features and labelled using the actual cotton lint labels (a, c and e) and the K-means clusters (b, d and f) for cultivar Giza 905

**Figure S7** The feature impurity plotted against L* (a.b), a* (c,d) and b* (e,f) features and labelled using the actual cotton lint labels (a, c and e) and the K-means clusters (b, d and f) for cultivar Giza 946

**Figure S8** The feature impurity plotted against L* (a.b), a* (c,d) and b* (e,f) features and labelled using the actual cotton lint labels (a, c and e) and the K-means clusters (b, d and f) for cultivar Giza 967


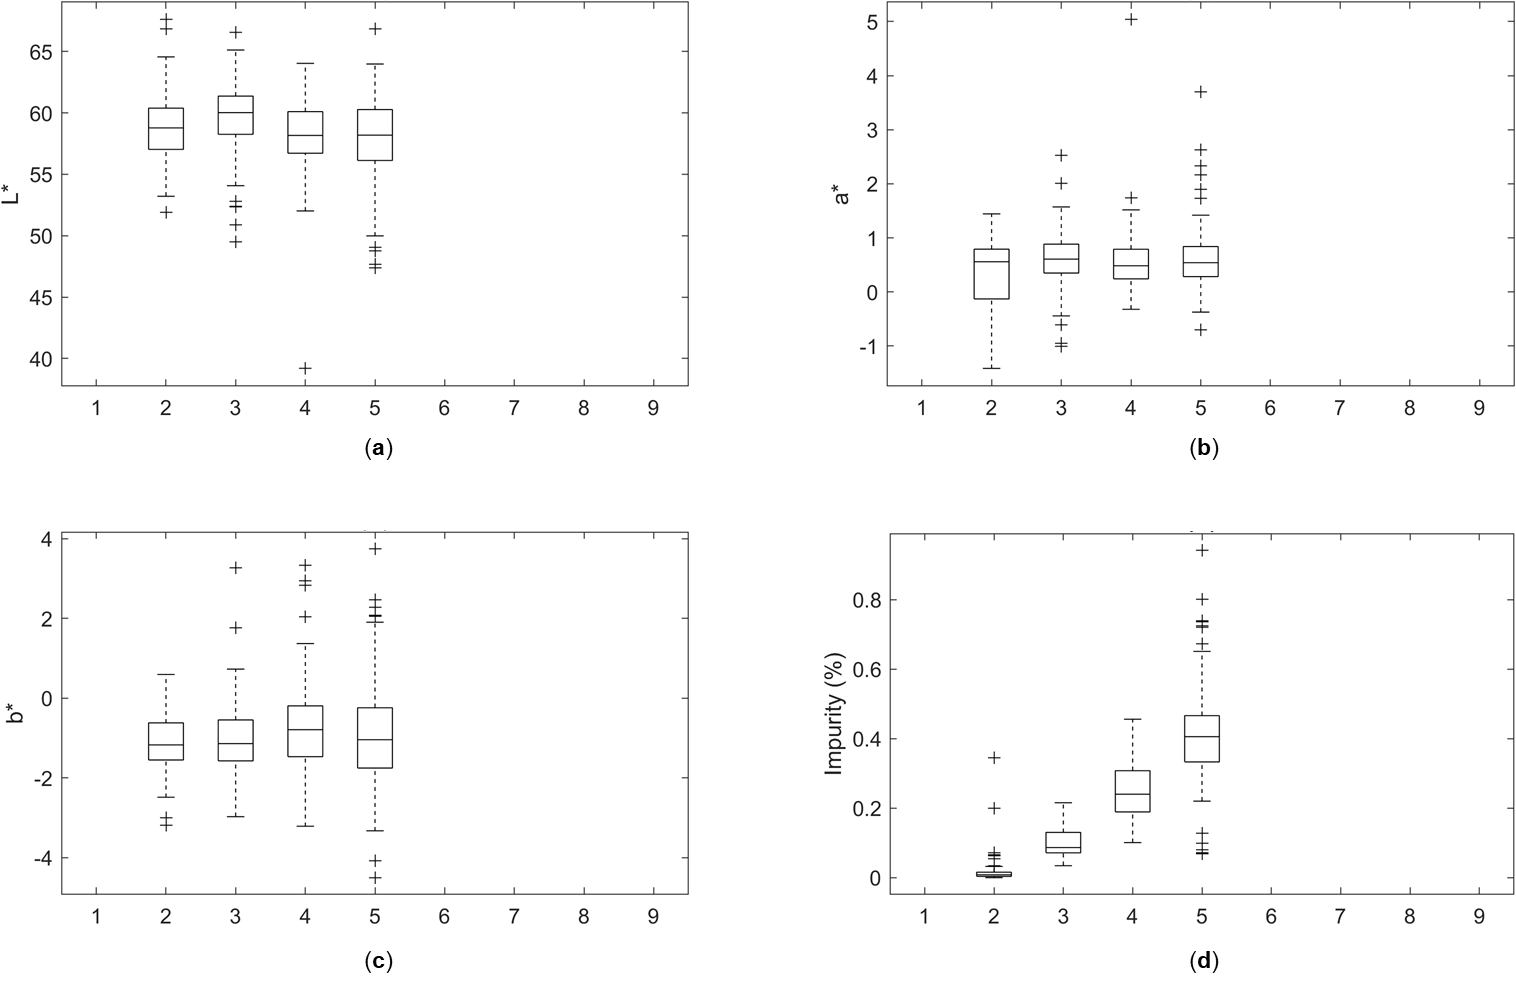


Figure S1 Distribution of the cultivar Giza 87 extracted features (a) L*, (b) a*, (c) b* and (d) impurity data across the Egyptian cotton lint grades


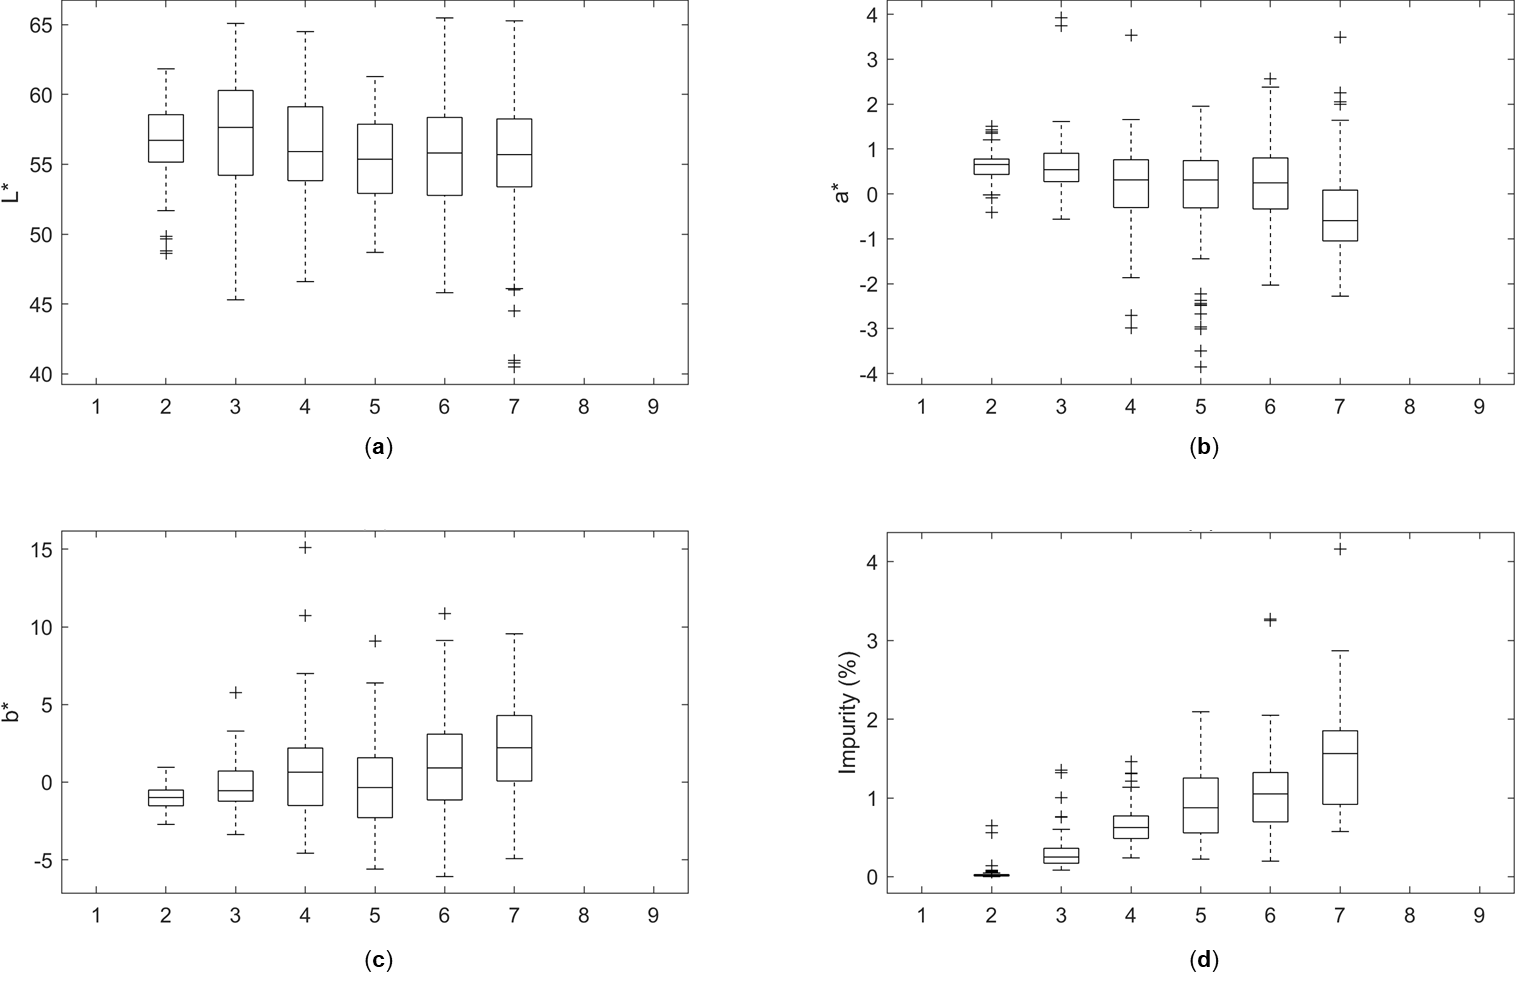


Figure S2 Distribution of the cultivar Giza 90 extracted features (a) L*, (b) a*, (c) b* and (d) impurity data across the Egyptian cotton lint grades


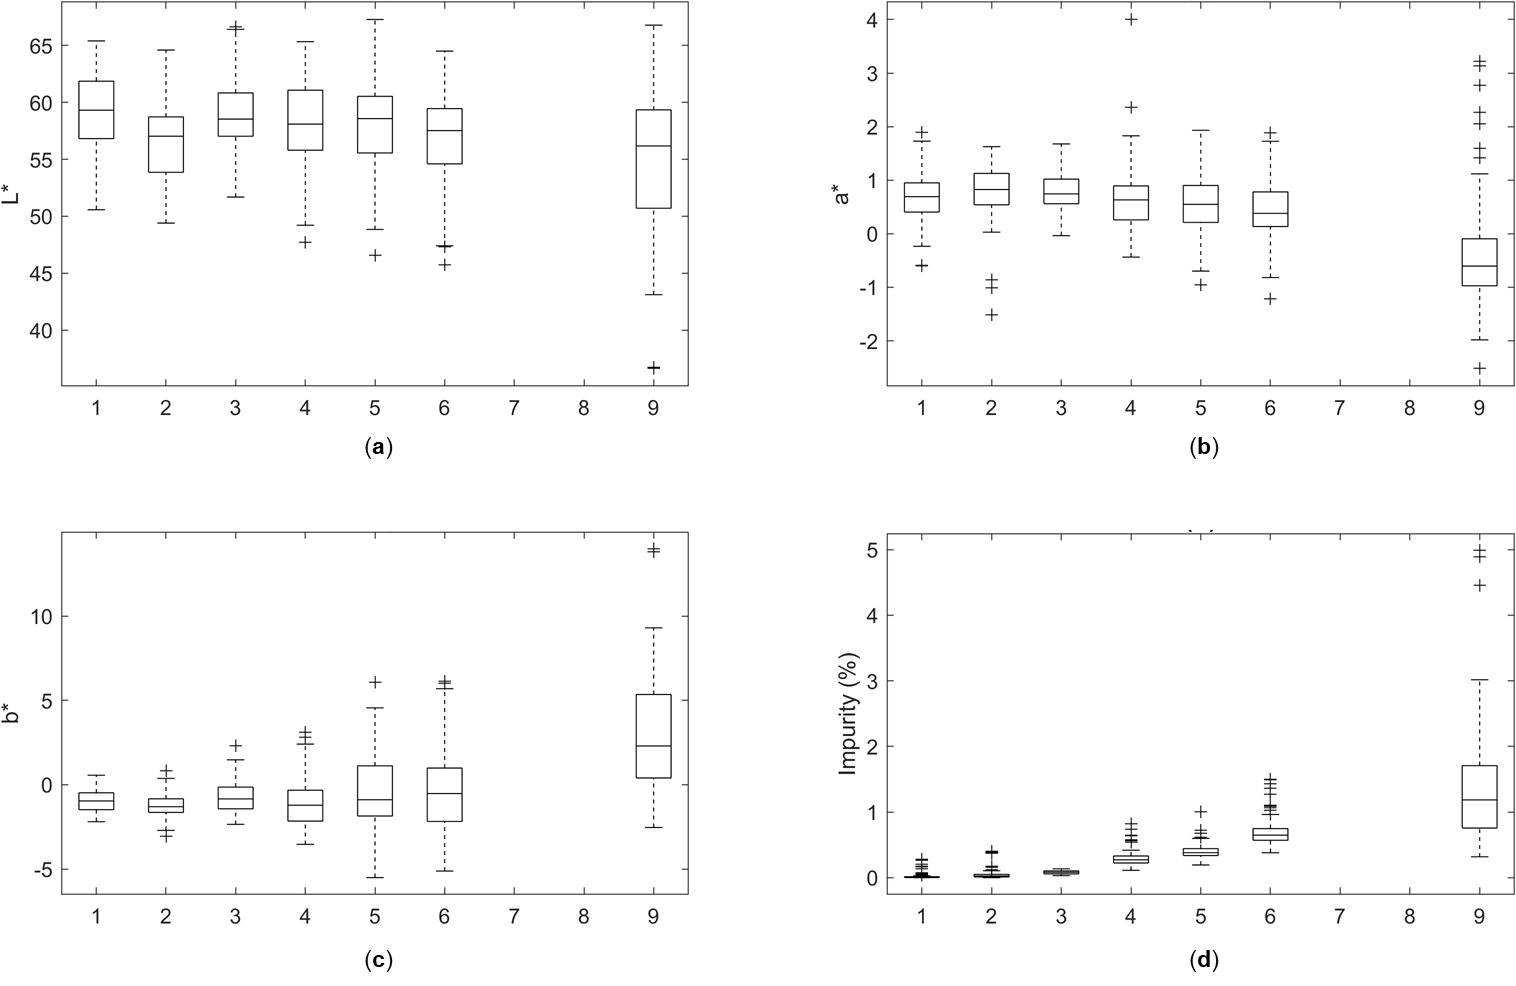


Figure S3 Distribution of the cultivar Giza 94 extracted features (a) L*, (b) a*, (c) b* and (d) impurity data across the Egyptian cotton lint grades


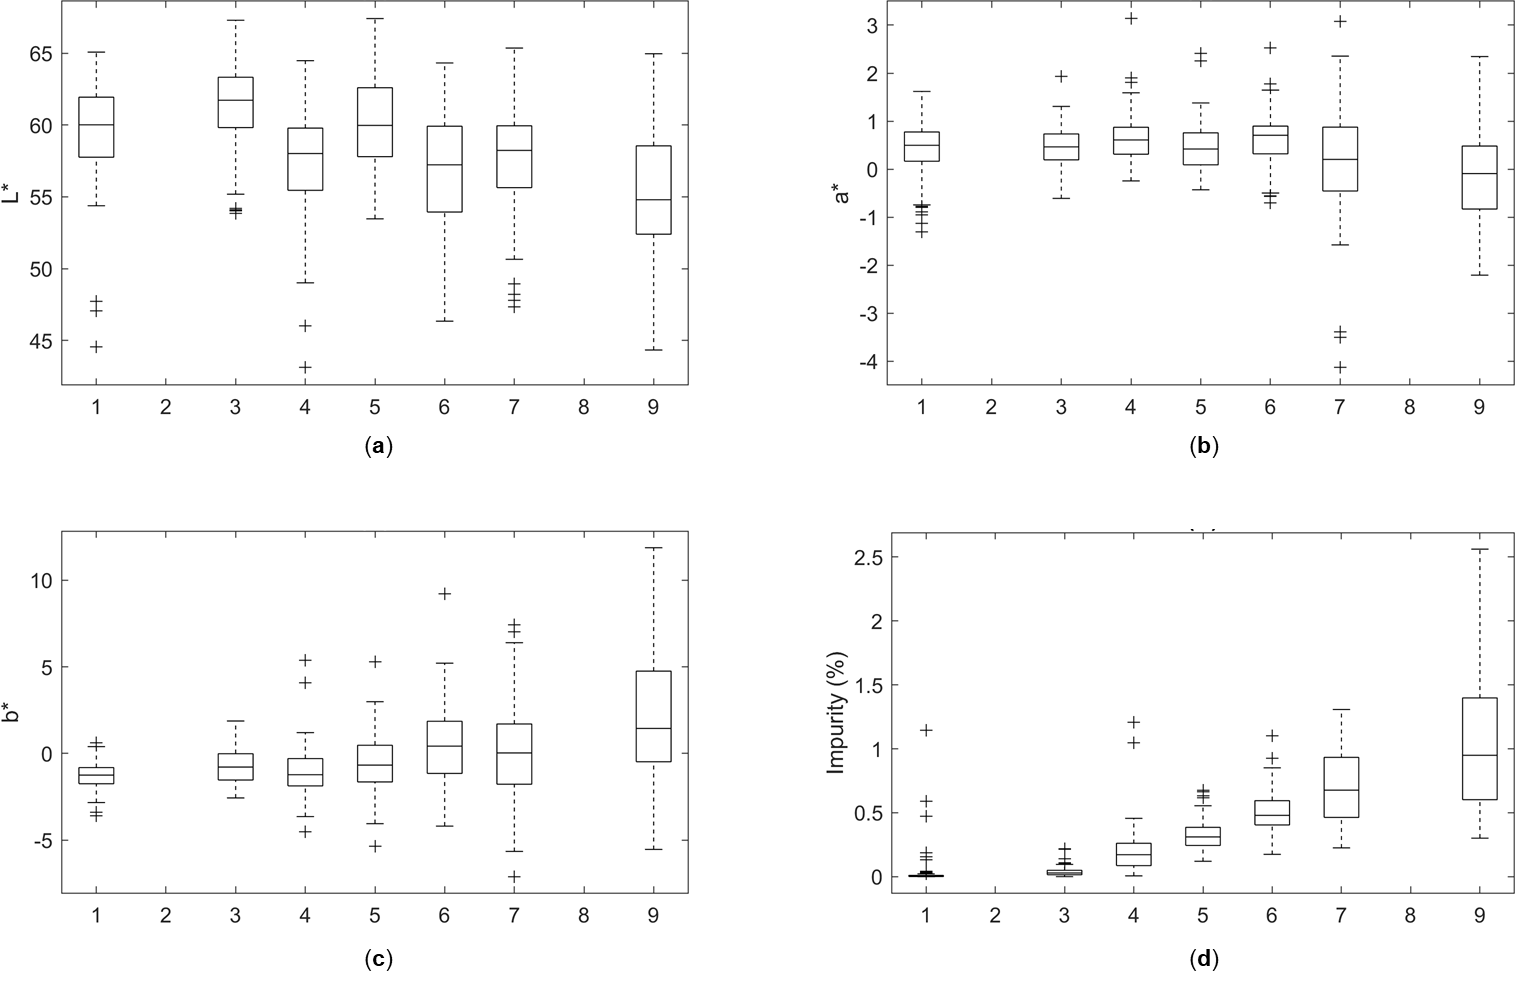


Figure S4 Distribution of the cultivar Giza 96 extracted features (a) L*, (b) a*, (c) b* and (d) impurity data across the Egyptian cotton lint grades


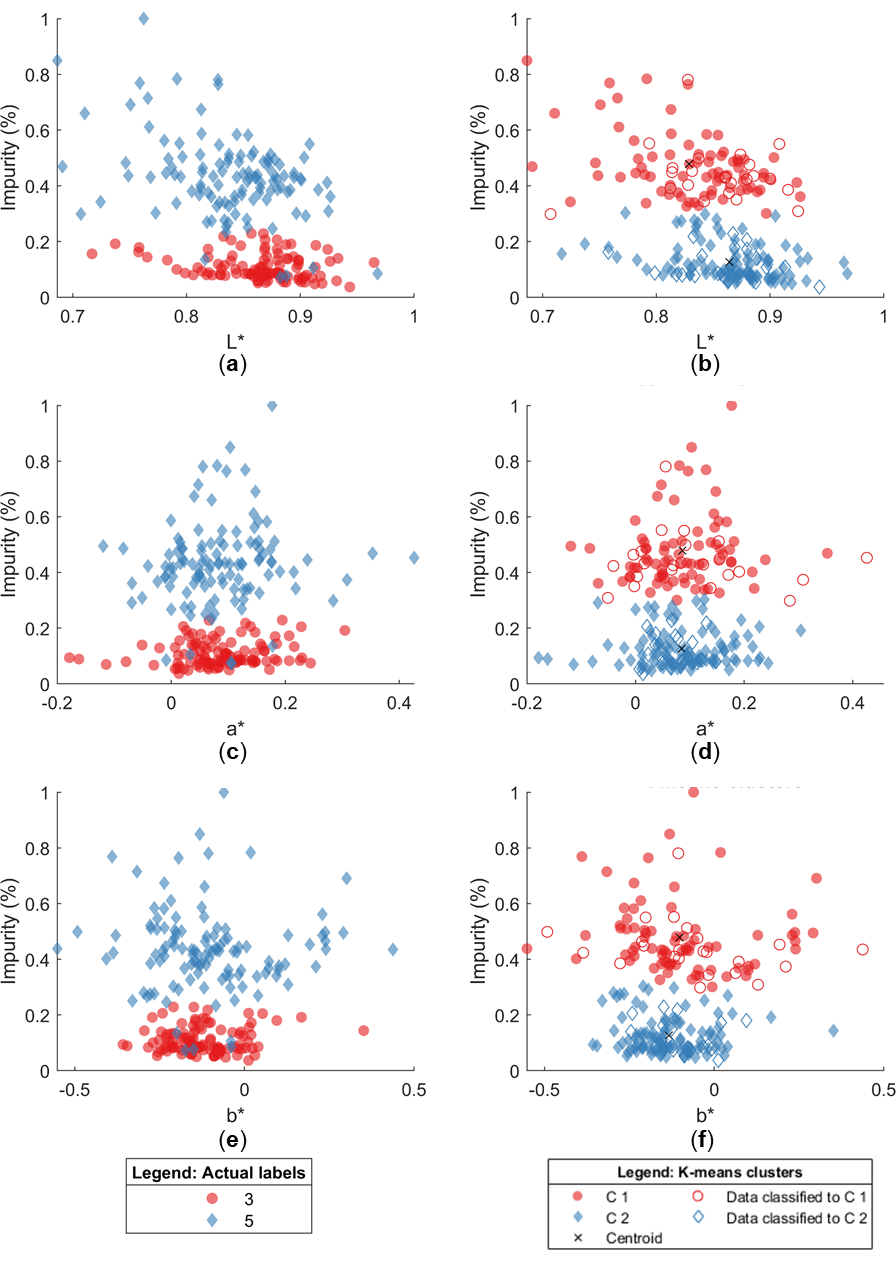


Figure S5 The feature impurity plotted against L* (a.b), a* (c,d) and b* (e,f) features and labelled using the actual cotton lint labels (a, c and e) and the K-means clusters (b, d and f) for cultivar Giza 87.


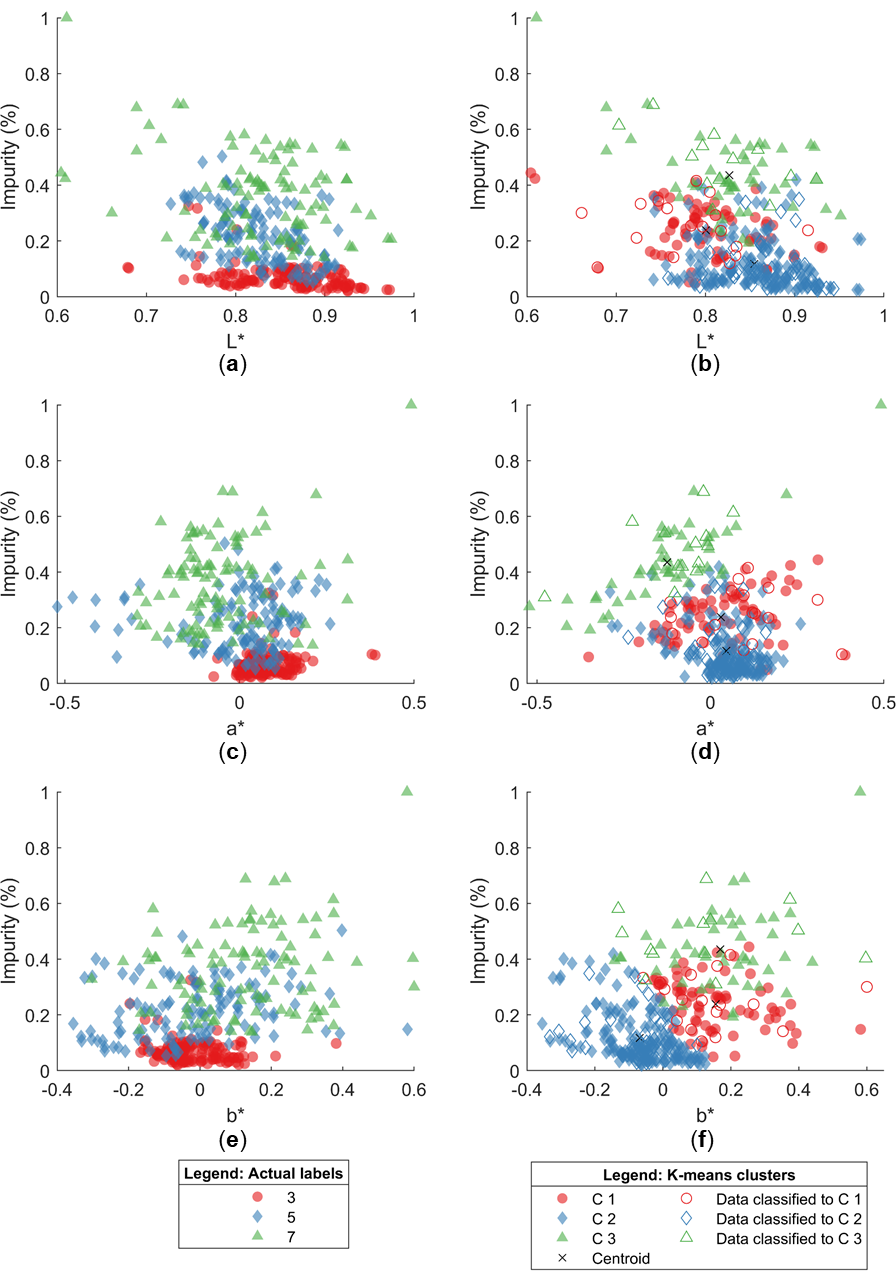


Figure S6 The feature impurity plotted against L* (a.b), a* (c,d) and b* (e,f) features and labelled using the actual cotton lint labels (a, c and e) and the K-means clusters (b, d and f) for cultivar Giza 90.


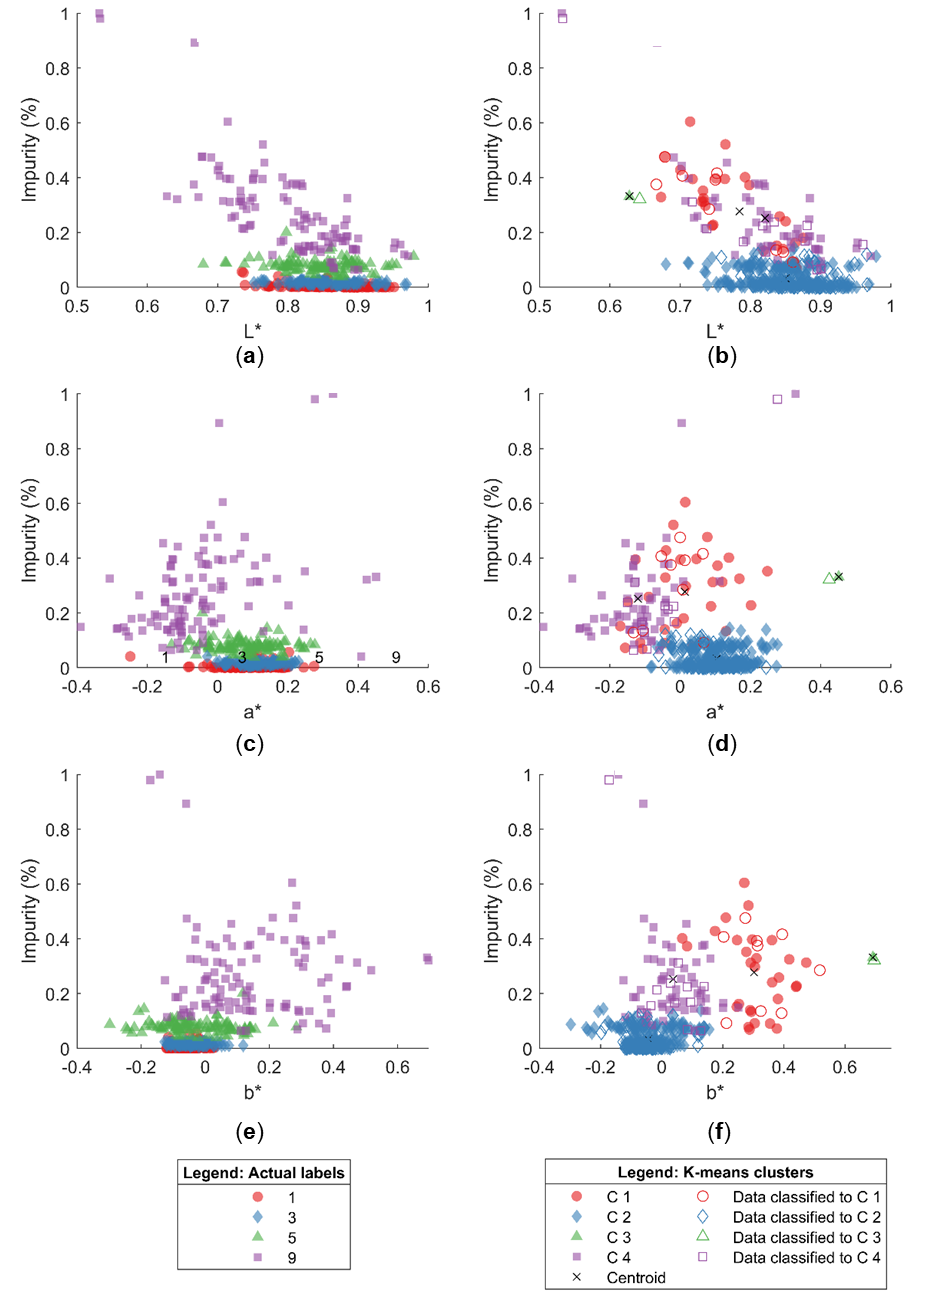


Figure S7 The feature impurity plotted against L* (a.b), a* (c,d) and b* (e,f) features and labelled using the actual cotton lint labels (a, c and e) and the K-means clusters (b, d and f) for cultivar Giza 94.


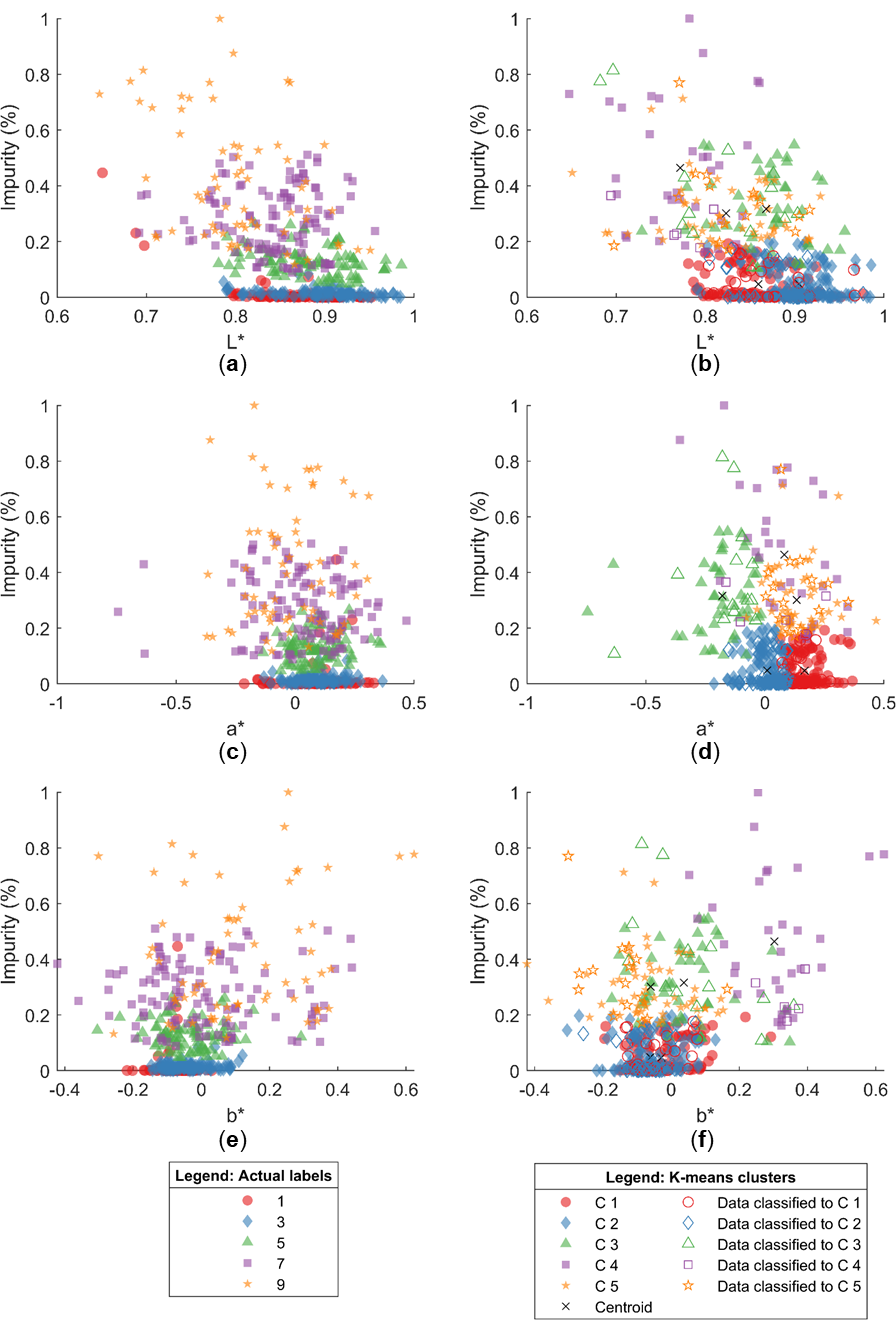


Figure S8 The feature impurity plotted against L* (a.b), a* (c,d) and b* (e,f) features and labelled using the actual cotton lint labels (a, c and e) and the K-means clusters (b, d and f) for cultivar Giza 96.
